# Supplementary material for: Influence of high-latitude atmospheric circulation changes on summertime Arctic sea ice
Source: Springer Nature journal article supplement (doi:10.1038/nclimate3241), 2017-03-13
Supplement: 41558_2017_BFnclimate3241_MOESM268_ESM.pdf [file 41558_2017_BFnclimate3241_MOESM268_ESM.pdf]

In the format provided by the authors and unedited.

# Influence of high-latitude atmospheric circulation changes on summertime Arctic sea ice

**Qinghua Ding<sup>1,2,3\*</sup>, Axel Schweiger<sup>3</sup>, Michelle L'Heureux<sup>4</sup>, David S. Battisti<sup>5,6</sup>, Stephen Po-Chedley<sup>5</sup>, Nathaniel C. Johnson<sup>7</sup>, Eduardo Blanchard-Wrigglesworth<sup>5</sup>, Kirstin Harnos<sup>4</sup>, Qin Zhang<sup>4</sup>, Ryan Eastman<sup>5</sup> and Eric J. Steig<sup>5,6</sup>**

---

<sup>1</sup>Department of Geography, University of California, Santa Barbara, California 93106, USA. <sup>2</sup>Earth Research Institute, University of California, Santa Barbara, California 93106, USA. <sup>3</sup>Polar Science Center, Applied Physics Laboratory, University of Washington, Seattle, Washington 98195, USA. <sup>4</sup>NOAA Climate Prediction Center, College Park, Maryland 20740, USA. <sup>5</sup>Department of Atmospheric Sciences, University of Washington, Seattle, Washington 98195, USA. <sup>6</sup>Department of Earth and Space Sciences, University of Washington, Seattle, Washington 98195, USA. <sup>7</sup>Cooperative Institute for Climate Science, Princeton University, Princeton, New Jersey 08540, USA. \*e-mail: [qinghua@ucsb.edu](mailto:qinghua@ucsb.edu)

Supplementary Figures for Ding et al., “Influence of high-latitude atmospheric ...”

This document includes the Supplementary Figures that are referred to in the main text.

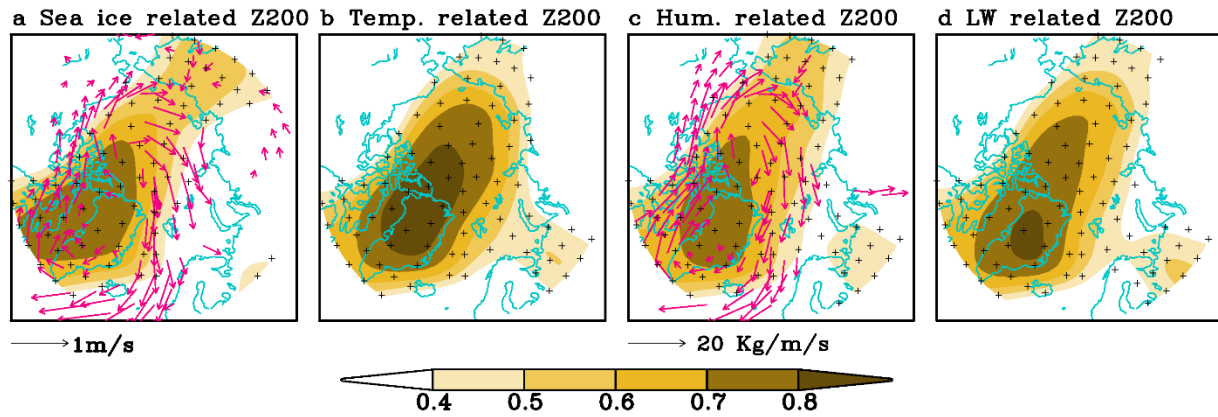

**Supplementary Fig. 1** Same as Fig. 1 d) to g), but using raw data in calculating the correlation. Stippling indicates statistical significant correlation at the 5% level.

## Supplementary Figures for Ding et al., “Influence of high-latitude atmospheric ...”

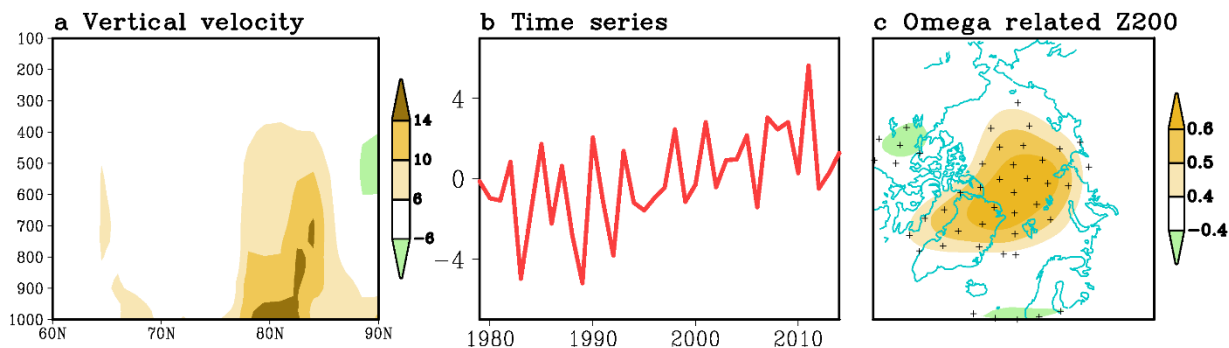

**Supplementary Fig 2** a) Meridional cross section of linear trend of zonal mean JJA vertical velocity ( $10^{-5}$  Pa/s/decade) in ERA-I (1979-2014). b) Domain averaged JJA lower level vertical velocity (1000hPa to 700hPa, unit:  $10^{-5}$  Pa/s) in the Arctic (north of 70°N). c) Correlation of omega index in (b) with JJA Z200 in 1979-2014. The trends are removed before the calculation. In c) stippling indicates statistical significant correlation at the 5% level.

## Supplementary Figures for Ding et al., “Influence of high-latitude atmospheric ...”

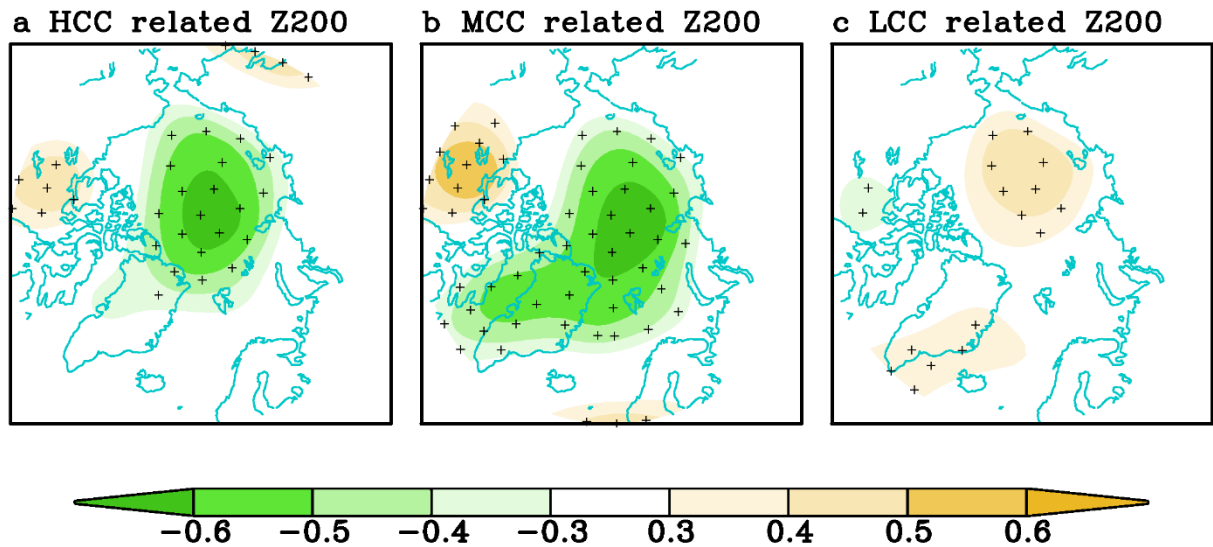

**Supplementary Fig 3.** Correlation of a domain (north of 70°N) averaged JJA cloudiness index in the upper level (HCC), middle level (MCC) and lower level (LCC) with JJA Z200 (a to c) in 1979-2014. The trends are removed before the calculation. Cloud data is from the ERA-I reanalysis. Stippling indicates statistical significant correlation at the 5% level.

## Supplementary Figures for Ding et al., “Influence of high-latitude atmospheric ...”

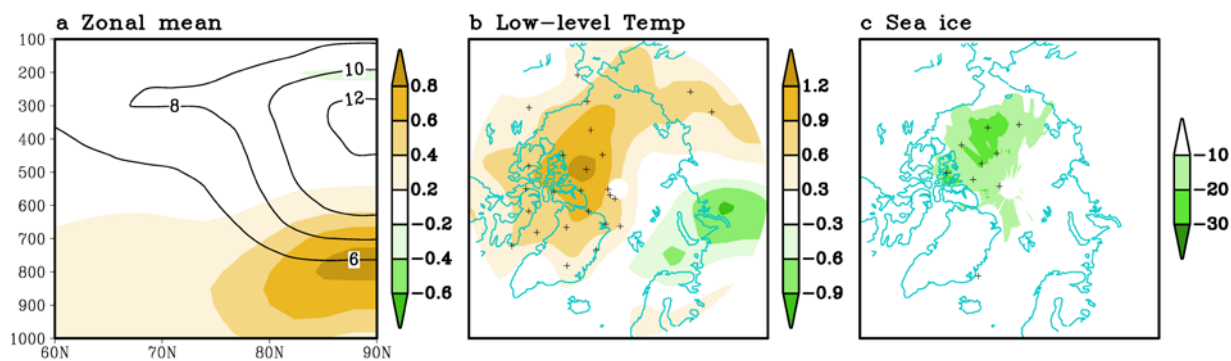

**Supplementary Fig 4:** Linear trends of a) meridional cross section of zonal mean JJA temperature (shading, °C per decade) and geopotential height (black contour, m per decade), b) JJA lower level temperature (100hPa-750hPa) and c) September sea ice (% per decade) simulated in Exp-3 in which the model is nudged to observed ERA-I winds above 700hPa. Stippling indicates statistical significant trends at the 5% level.

## Supplementary Figures for Ding et al., “Influence of high-latitude atmospheric ...”

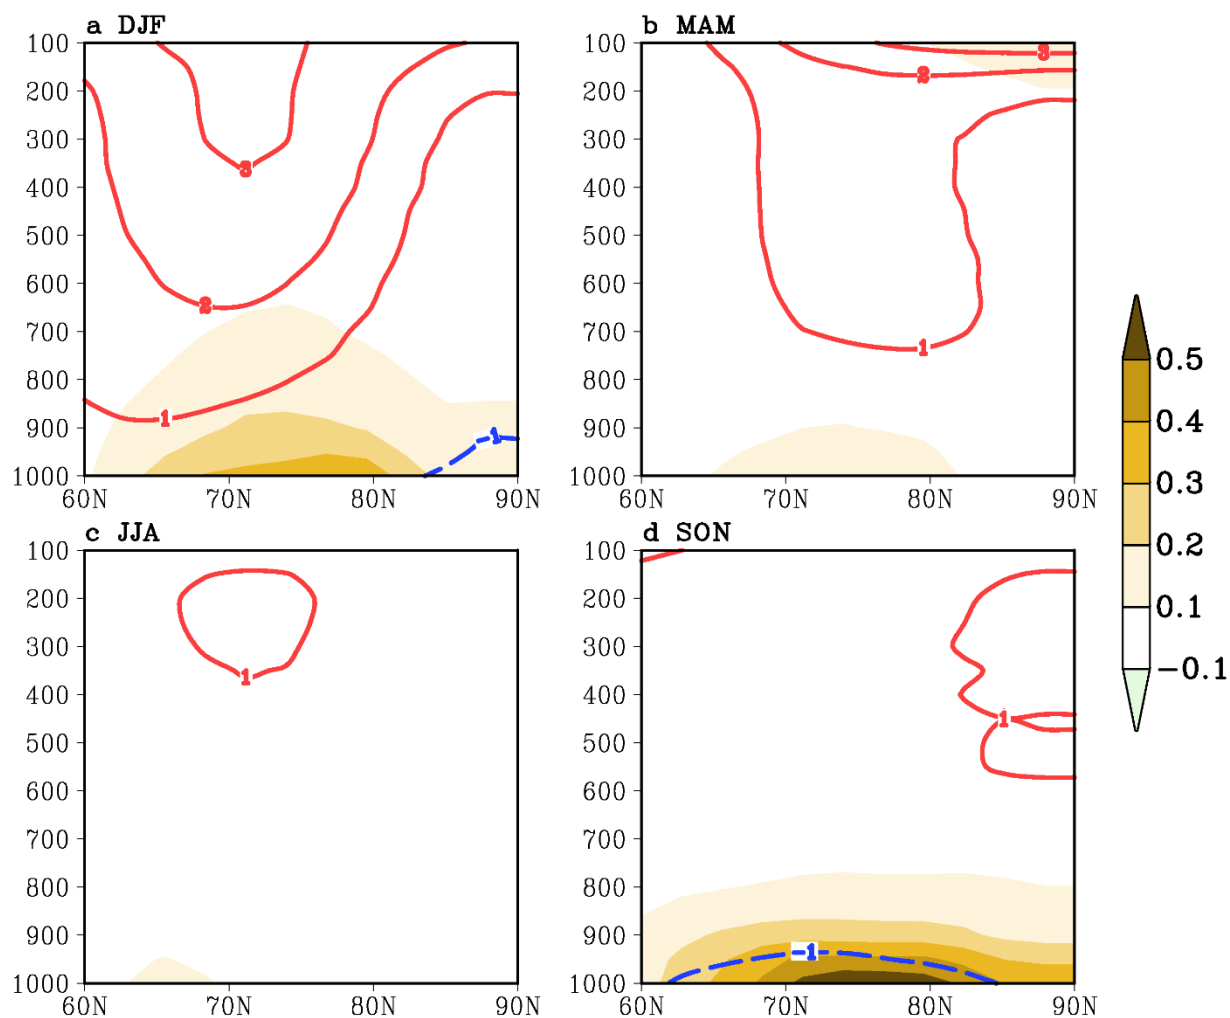

**Supplementary Fig. 5** Meridional cross section of linear trend of zonal mean temperature (shading:  $^{\circ}\text{C}$  per decade) and geopotential height (contour: m per decade) in Exp-4 (1979-2014) in each season.

## Supplementary Figures for Ding et al., “Influence of high-latitude atmospheric ...”

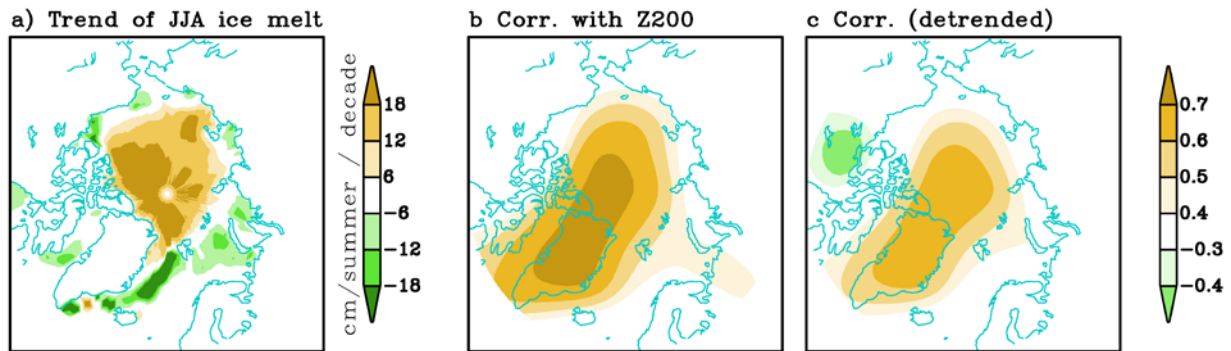

**Supplementary Fig. 6:** a) Linear trend of JJA total sea ice melting in POP2-CICE4 run forced by ERA-I forcing during 1979-2014 period (Exp-5). b) Correlation between the domain averaged JJA total melting in the Arctic (north of 70°N) and JJA Z200 during the period 1979-2014. c) same as b) but using the detrended components of the melting index and JJA Z200 in the Arctic.

Supplementary Figures for Ding et al., “Influence of high-latitude atmospheric ...”

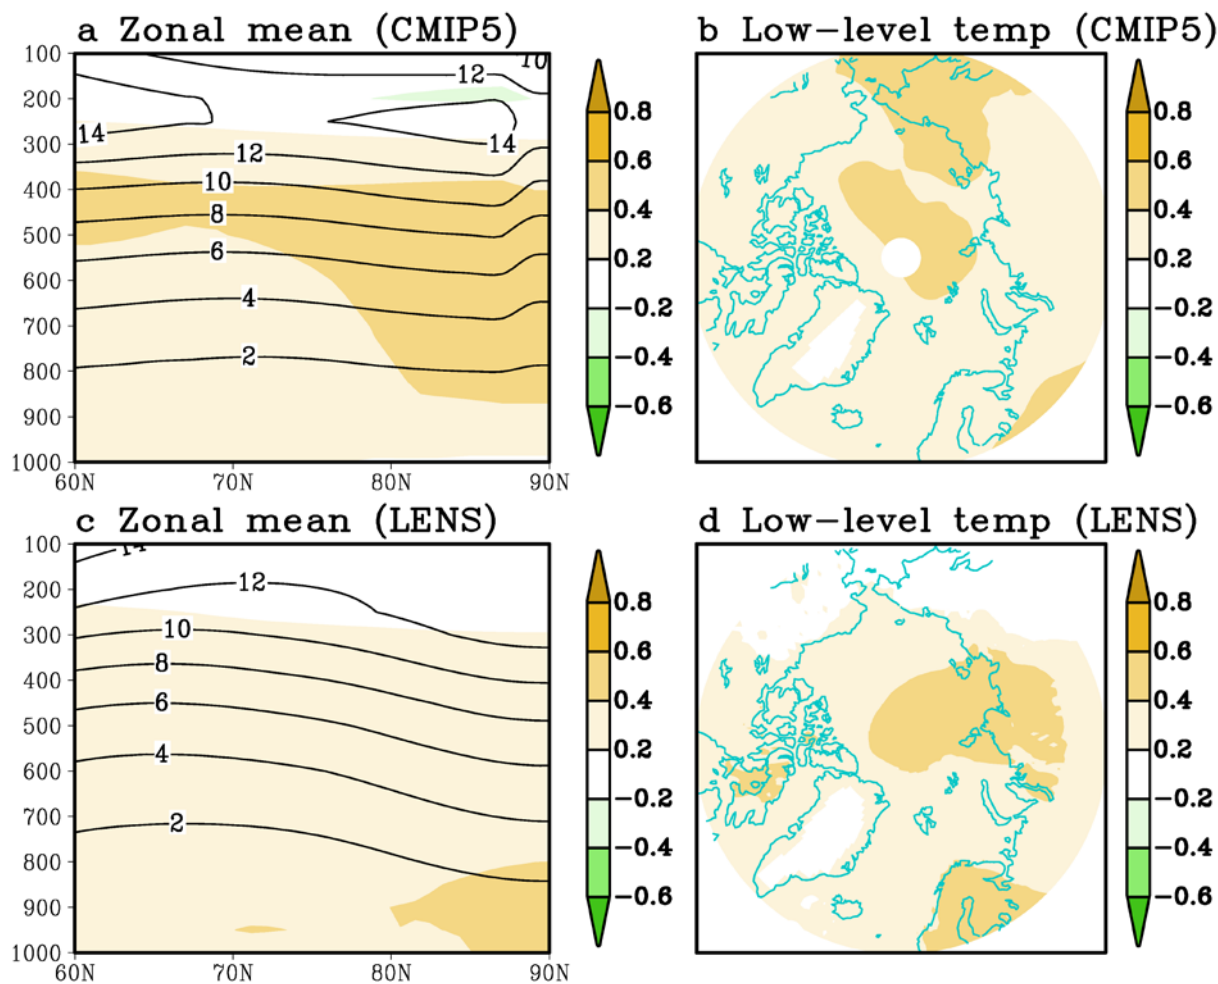

**Supplementary Fig. 7** a) & c) Meridional cross section of the linear trend of zonal mean JJA temperature (shading: °C per decade) and geopotential height (contour: m per decade) in CMIP5 projects (1979-2014, upper panels) and CESM LENS (1979-2014, lower panels); b) & d) Linear trend of lower tropospheric (surface to 750hPa) JJA temperature (°C per decade) in CMIP5 (1979-2014) and CESM LENS (1979-2014).



## Supplementary Figures for Ding et al., “Influence of high-latitude atmospheric ...”

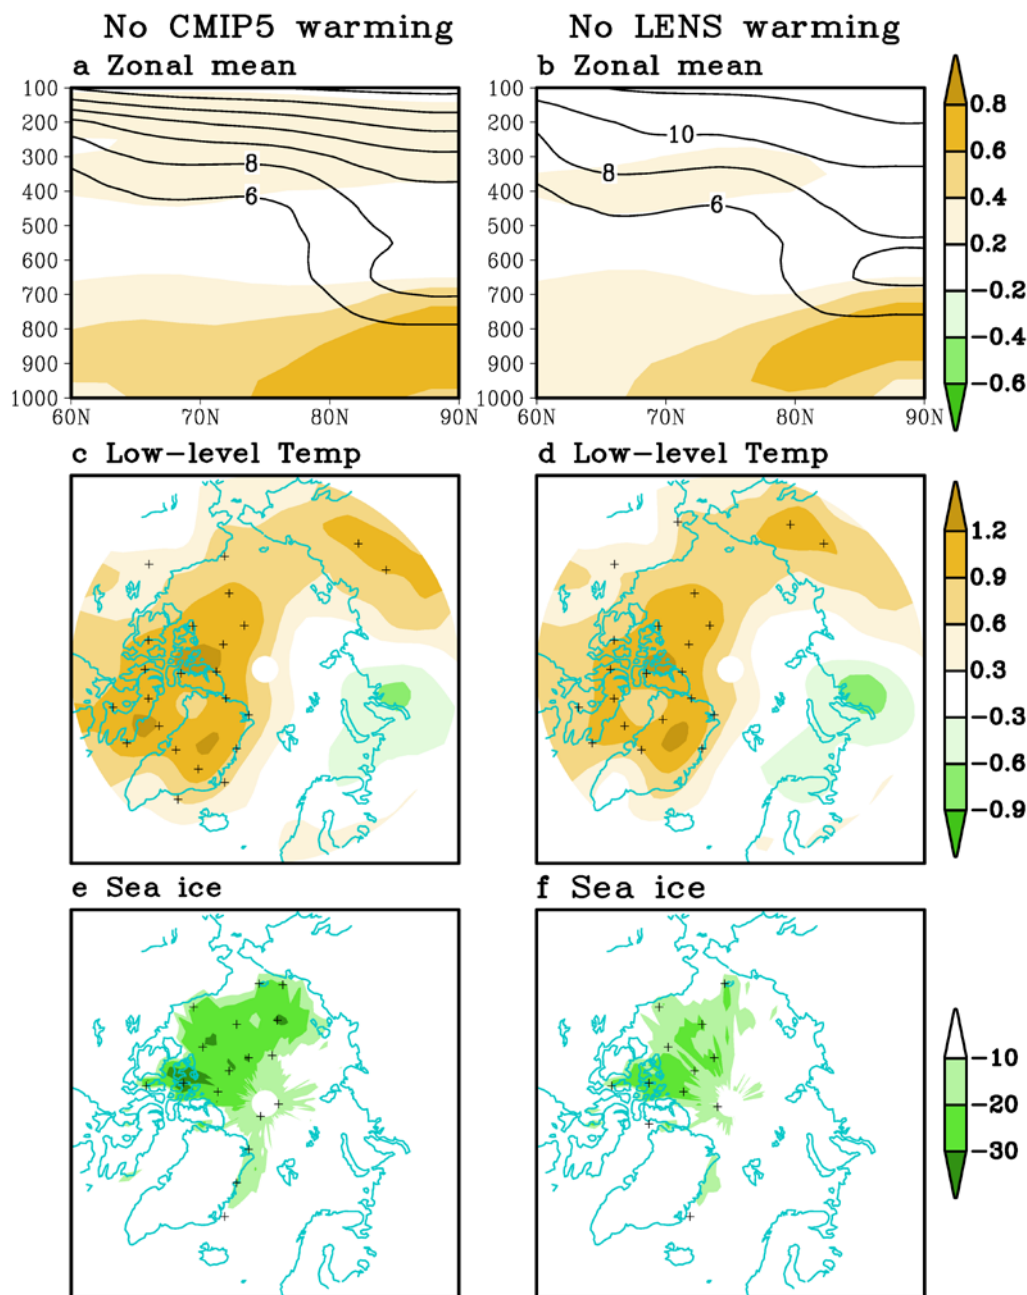

**Supplementary Fig. 8:** Linear trends of a) & b) meridional cross section of zonal mean JJA temperature (shading, °C per decade) and geopotential height (black contour, m per decade, c) & d) JJA lower level temperature (1000hPa-750hPa) and e) & f) September sea ice (% per decade) simulated in two ECHAM5 nudged experiments (Exp-7 and 8) in which the global wind patterns (zonal and meridional) forced by anthropogenic forcing in CMIP5 (left column) and LENS (right column) projects are removed from ERA-I observed winds.

## Supplementary Figures for Ding et al., “Influence of high-latitude atmospheric ...”

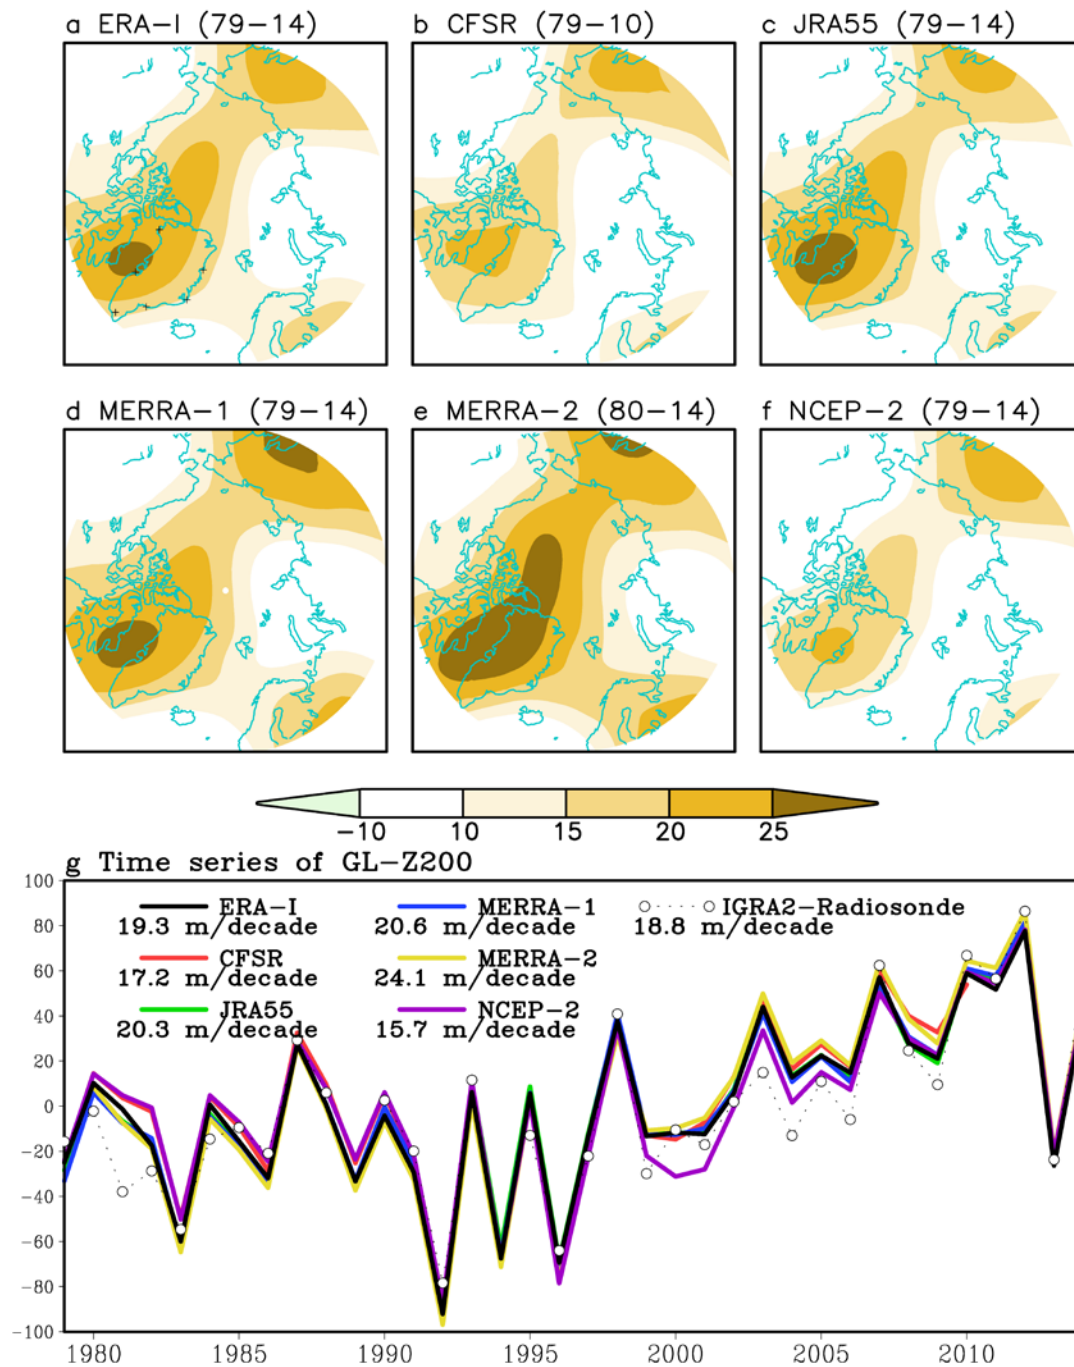

**Supplementary Fig. 9:** a) to f) Linear trends of JJA Z200 from six different reanalysis datasets and the time series of g) GL-Z200 derived from each reanalysis and six IGRA2 radiosonde stations (location of the stations is marked in panel a, 1989&1994 data are not used because data in this two years doesn't pass the quality control). Linear trend of each index (m/decade) is denoted below its name.

## Supplementary Figures for Ding et al., “Influence of high-latitude atmospheric ...”

**Supplementary Table 1:** 26 climate models in the CMIP5 historical experiment. List of 26 CMIP5 CGCMs used in Fig. 4 to examine the forced response of the climate system to anthropogenic and natural external forcing, along with the number of atmospheric horizontal grids.

| CMIP5 model designation | nx  | ny  |
|-------------------------|-----|-----|
| 1. ACCESS1-0            | 192 | 144 |
| 2. ACCESS1-3            | 192 | 144 |
| 3. bcc-csm1-1           | 128 | 64  |
| 4. bcc-csm1-1-m         | 320 | 160 |
| 5. BNU-ESM              | 128 | 64  |
| 6. CCSM4                | 288 | 192 |
| 7. CNRM-CM5             | 256 | 128 |
| 8. CSIRO-Mk3-6-0        | 192 | 96  |
| 9. CanESM2              | 128 | 64  |
| 10. FGOALS-g2           | 128 | 60  |
| 11. GFDL-CM3            | 144 | 90  |
| 12. GFDL-ESM2G          | 144 | 90  |
| 13. GFDL-ESM2M          | 144 | 90  |
| 14. GISS-E2-H           | 144 | 89  |
| 15. GISS-E2-R           | 144 | 89  |
| 16. HadGEM2-AO          | 192 | 144 |
| 17. inmcm4              | 180 | 120 |
| 18. IPSL-CM5A-LR        | 96  | 96  |
| 19. IPSL-CM5A-MR        | 144 | 143 |
| 20. IPSL-CM5B-LR        | 96  | 96  |
| 21. MIROC-ESM           | 128 | 64  |
| 22. MIROC5              | 256 | 128 |
| 23. MPI-ESM-LR          | 192 | 96  |
| 24. MPI-ESM-MR          | 192 | 96  |
| 25. MRI-CGCM3           | 320 | 160 |
| 26. NorESM1-ME          | 144 | 96  |
